# Supplementary material for: Antibody-mediated delivery of a viral MHC-I epitope into the cytosol of target tumor cells repurposes virus-specific CD8+ T cells for cancer immunotherapy
Source: PubMed Central journal article supplement (PMC9027861; doi:10.1186/s12943-022-01574-0), 2022-04-22
Supplement: 12943_2022_1574_MOESM1_ESM.pdf [file 12943_2022_1574_MOESM1_ESM.pdf]

## **Supplementary information for**

**Antibody-mediated delivery of a viral MHC-I epitope into the cytosol of target tumor cells repurposes virus-specific CD8<sup>+</sup> T cells for cancer immunotherapy**

Keunok Jung, Min-Jeong Son, Se-Young Lee, Jeong-Ah Kim, Deok-Han Ko, Sojung Yoo, Chul-Ho Kim, Yong-Sung Kim

**This additional file includes:**

Figs. S1 to S10  
Tables S1 to S4

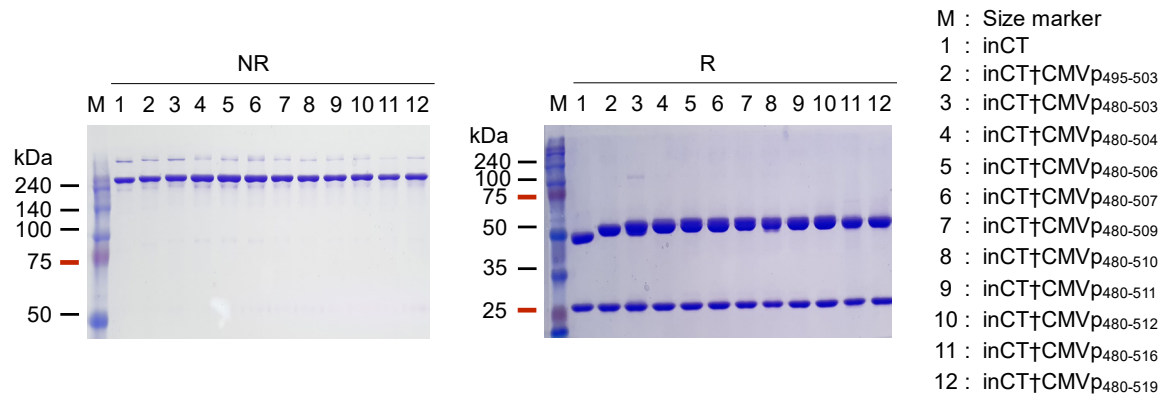

**Figure S1. SDS-PAGE analysis of the TEDbodies carrying various CMVp<sub>495-503</sub>-encompassing peptides.**

TEDbodies, designed as shown in Fig. 1B, were expressed using a standard HEK293F transient-expression system. The purified TEDbody (each 5  $\mu$ g) was analyzed by SDS-PAGE in a 10% gel under nonreducing conditions in the absence of the reducing agent dithiothreitol (DTT) (“NR”) (left panel), as well as by SDS-PAGE in a 12% gel under reducing conditions in the presence of 20 mM DTT (“R”) (right panel), and then was stained with Coomassie Brilliant Blue. The SDS-PAGE analysis revealed the presence of the heavy chain of a TEDbody with higher molecular weight than that of inCT due to the C terminus-fused peptide on the heavy chain. The inCT Ab was used as a control.

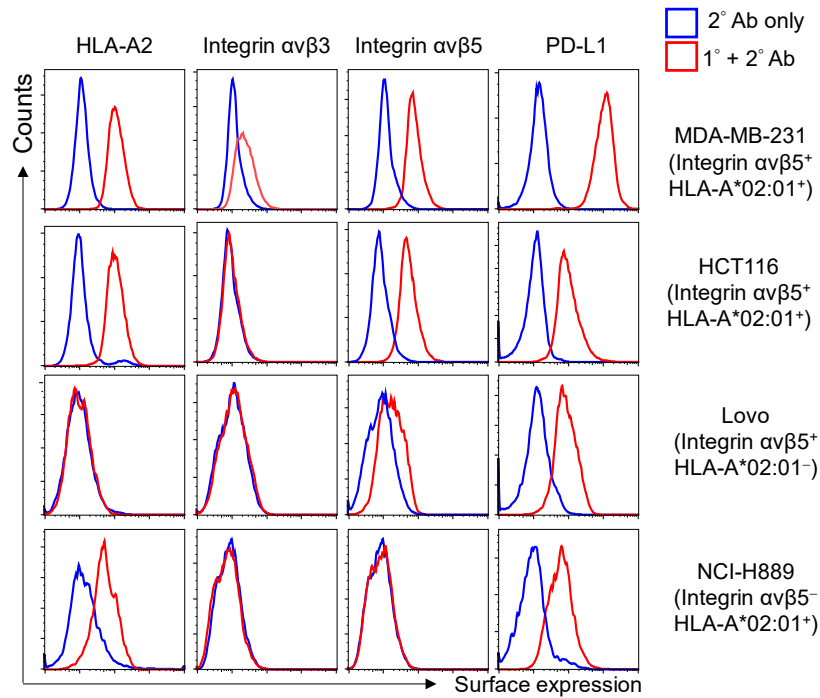

**Figure S2. Cell surface expression levels of HLA-A\*02, integrin αβ3, integrin αβ5, and PD-L1 in human cancer cell lines, as analyzed by flow cytometry.**

Representative flow cytometric histograms of two independent experiments are shown. Based on these analyses, the cells were designated as follows: MDA-MB-231 cells as HLA-A\*02:01<sup>+</sup> integrin αβ3/αβ5<sup>+</sup> PD-L1<sup>+</sup>, HCT116 cells as HLA-A\*02:01<sup>+</sup> integrin αβ5<sup>+</sup> integrin αβ3<sup>-</sup> PD-L1<sup>+</sup>, LoVo cells as HLA-A\*02:01<sup>-</sup> integrin αβ5<sup>+</sup> integrin αβ3<sup>-</sup> PD-L1<sup>+</sup>, and NCI-H889 cells as HLA-A\*02:01<sup>+</sup> integrin αβ3/αβ5<sup>-</sup> PD-L1<sup>+</sup>.

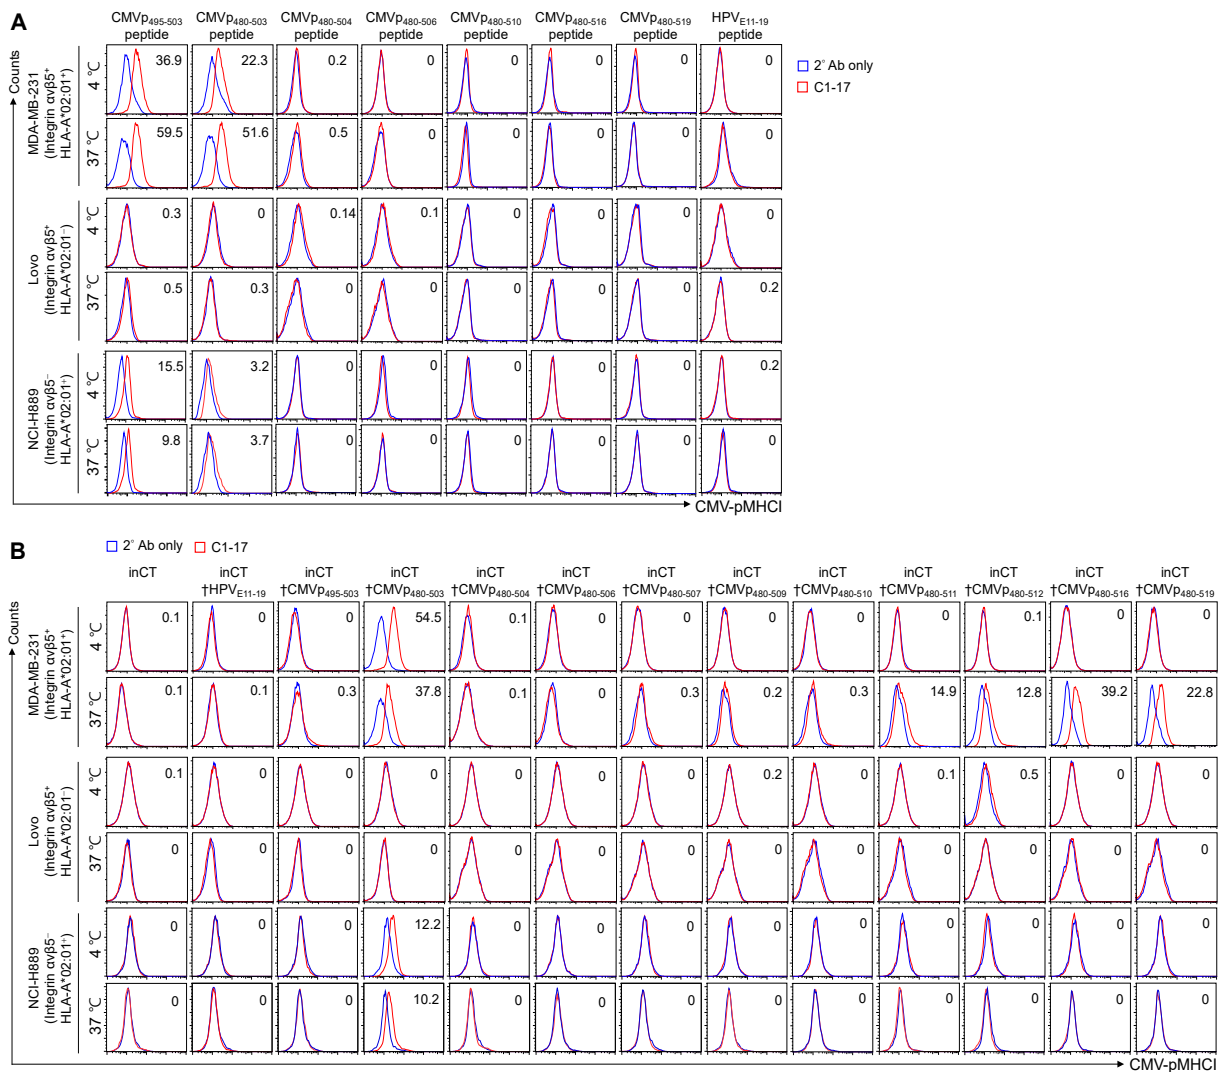

**Figure S3. Flow cytometric determination of cell surface CMV-pMHCI presentation induced by a synthetic peptide (A) or TEDbody and control Ab (B).**

A flow cytometric histogram of CMV-pMHCI display on the surface of HLA-A\*02:01<sup>+</sup> MDA-MB-231 cells and HLA-A\*02:01<sup>-</sup> LoVo cells, detected by the CMV-pMHCI-specific C1-17 Ab (red) in comparison with the control involving only the secondary Ab (blue). The cells were treated with the indicated synthetic peptide, TEDbody, or control Ab (4  $\mu$ M) at 4°C for 3 h or at 37°C for 18 h, followed by flow cytometric analysis of the cell surface presentation of CMV-pMHCI. A representative histogram from at least three independent experiments is shown.

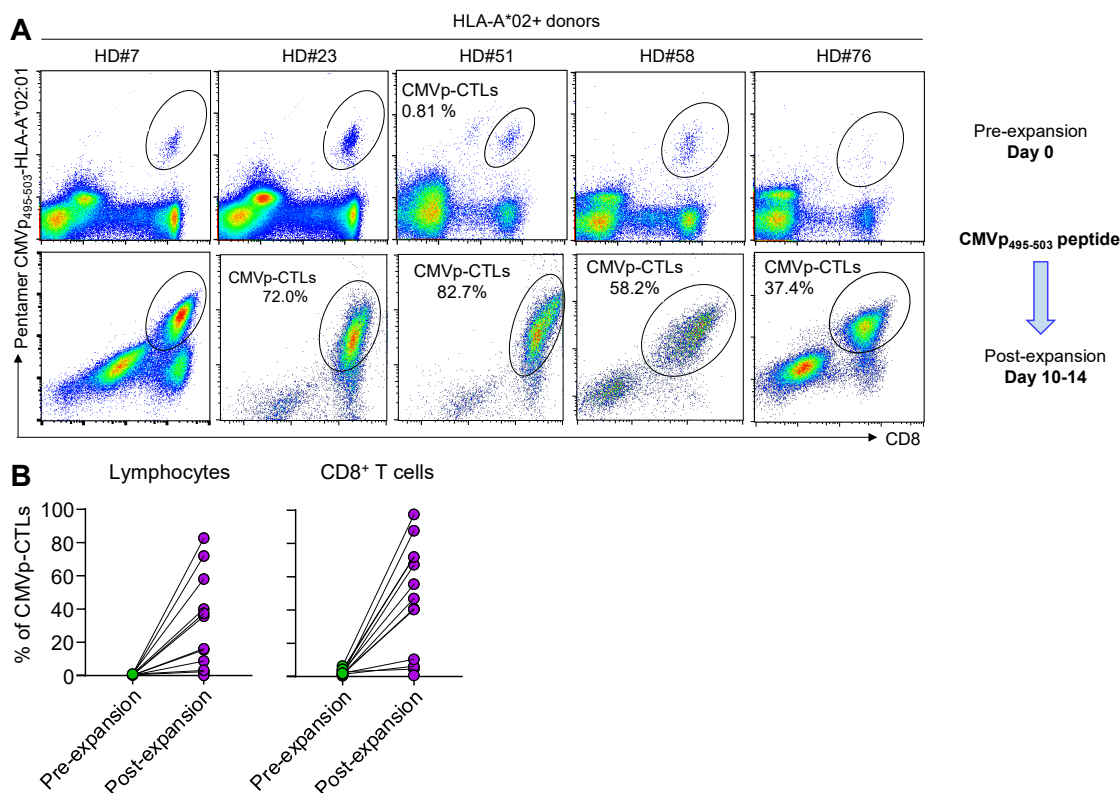

**Figure S4. Prevalence of CMVp-CTLs among PBMCs before and after *ex vivo* expansion with the CMVp<sub>495-503</sub> peptide.**

(A and B) Representative flow cytometry dot plots showing prevalence rates of CMVp-CTLs ( $n = 5$ ) (A) and the pairwise analysis ( $n = 12$ ) (B) of PBMCs from HLA-A\*02-positive, CMVp-CTL-seropositive healthy donors, before and after the *ex vivo* expansion with the synthetic CMVp<sub>495-503</sub> peptide (5  $\mu$ M) and cytokines for 14 to 18 days, as analyzed via flow cytometry by double staining with an anti-CD8 Ab and CMVp<sub>495-503</sub>-HLA-A\*02:01 pentamer and the gating settings shown in the plot. In (A), PBMCs were defined as CMVp-CTL-positive when the prevalence of CMVp-CTLs (i.e., double-positive cells stained with the anti-CD8 Ab and PE-conjugated CMVp<sub>495-503</sub>-HLA-A\*02:01 pentamer) is more than 0.1% of CD8<sup>+</sup> T cells among PBMCs ( $\geq 2.0 \times 10^5$  events were collected using the FACSCalibur flow cytometer). In (B), each symbol represents a value obtained from an individual donor. In total, PBMCs from 75 donors were analyzed. Forty-five out of 75 donors were positive for HLA-A\*02, and 28 out of 45 HLA-A\*02-positive donors were positive for CMVp-CTLs. Please see Table S2 for details.

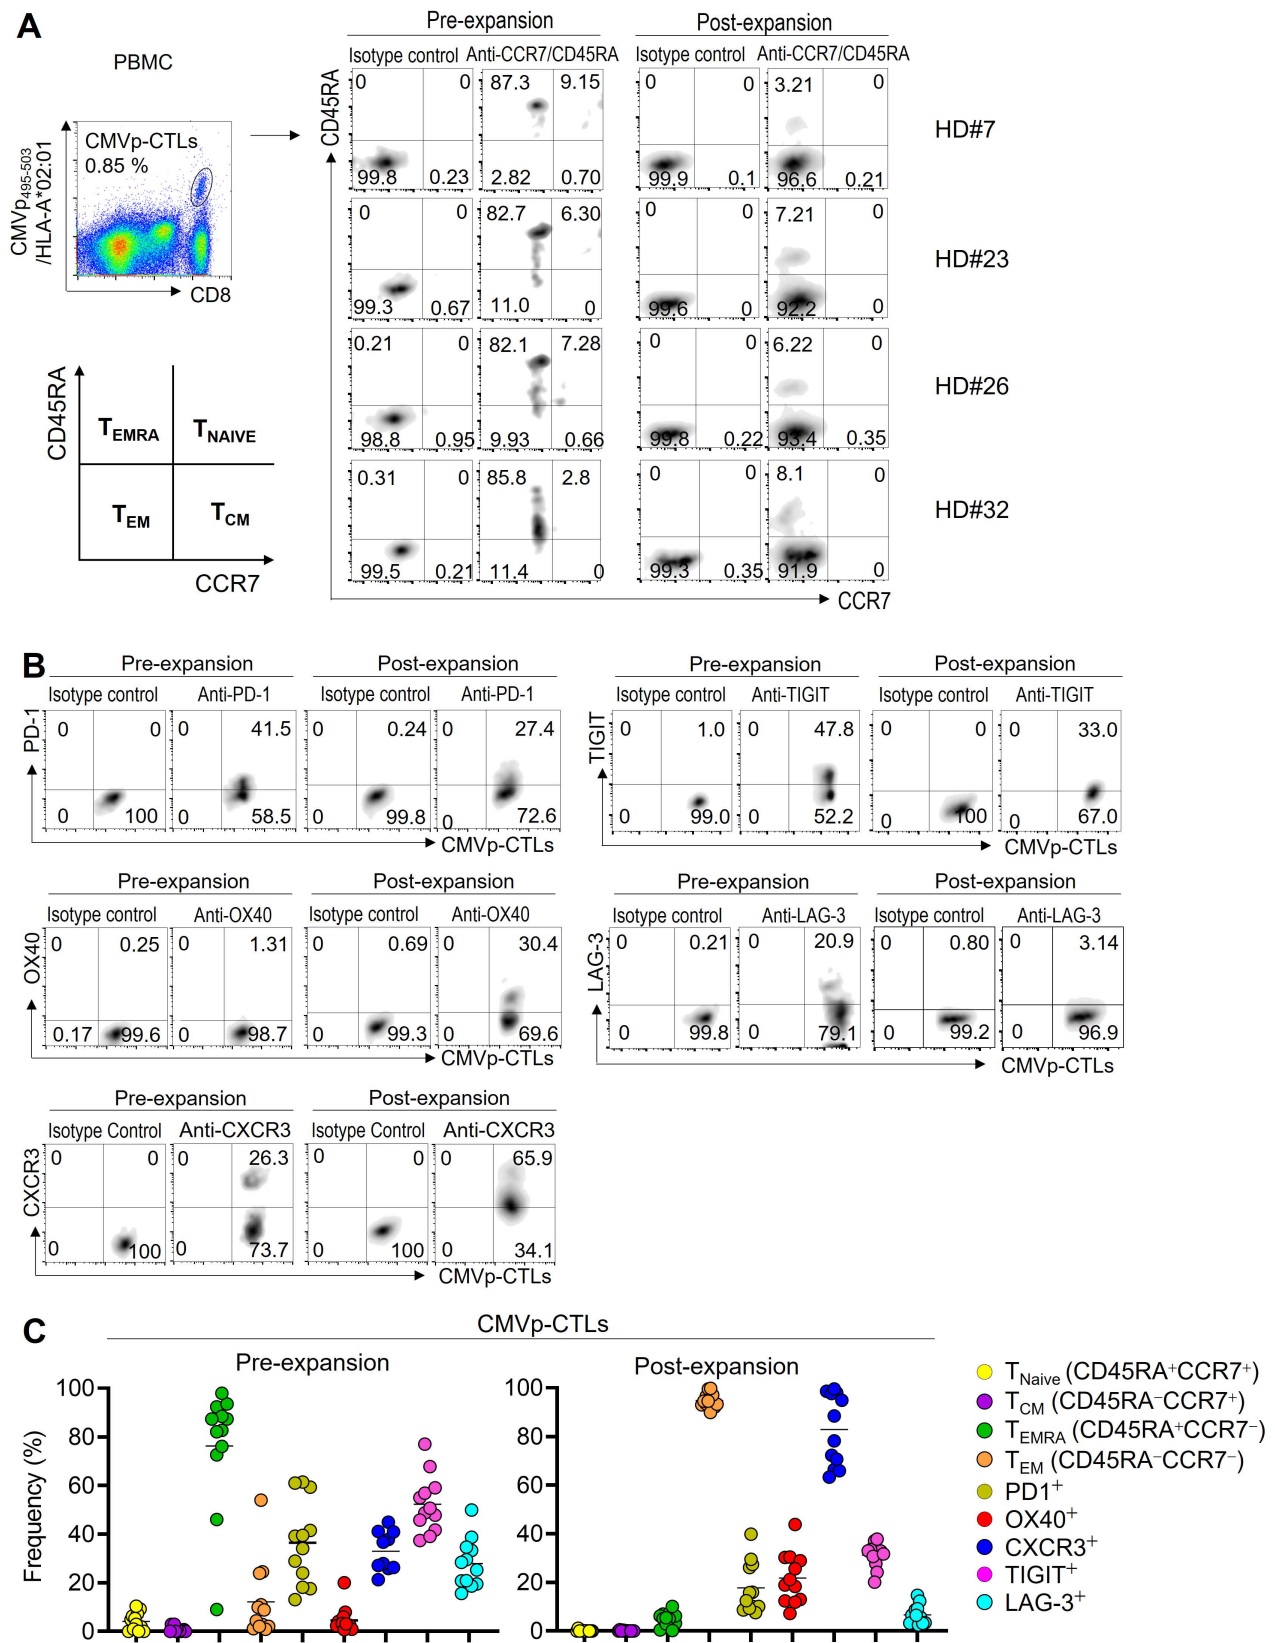

**Figure S5. Immunophenotyping of CMVp-CTLs among PBMCs before and after *ex vivo* expansion with the CMVp<sub>495-503</sub> peptide.**

**(A)** A representative flow cytometry dot plot showing the memory phenotype analysis of CMVp-CTLs among PBMCs from four donors, based on CCR7 and CD45RA expression on the cells. The inset is a schematic diagram categorizing CMVp-CTLs into the following four subsets: CCR7<sup>+</sup>CD45RA<sup>+</sup> naïve (T<sub>Naive</sub>) cells, CCR7<sup>+</sup>CD45RA<sup>-</sup> central memory (T<sub>CM</sub>) cells, CCR7<sup>-</sup>CD45RA<sup>-</sup> effector memory (T<sub>EM</sub>) cells, and CCR7<sup>-</sup>CD45RA<sup>+</sup> terminally differentiated effector memory (T<sub>EMRA</sub>) cells.

**(B)** A representative flow cytometry dot plot showing the expression of PD1, OX40, CXCR3, TIGIT, and LAG-3 among the CMVp-CTLs from PBMCs before and after the *ex vivo* expansion with the synthetic CMVp<sub>495-503</sub> peptide, as described in Fig. S4A.

**(C)** Prevalence rates of the four CD8<sup>+</sup> T cell subsets and cells expressing PD1, OX40, CXCR3, TIGIT, and LAG-3 among the CMVp-CTLs from PBMCs. The detection limit for the expression of PD1, OX40, CXCR3, TIGIT, and LAG-3 was set to 0.01% in the flow cytometric analysis. Midlines represent the mean values. 12 CMVp-CTL-positive PBMCs, before and after the *ex vivo* expansion with the synthetic CMVp<sub>495-503</sub> peptide, as described in Fig. S4A, were analyzed by flow cytometry. Each symbol represents a value obtained from an individual donor. See Table S4 for the details.

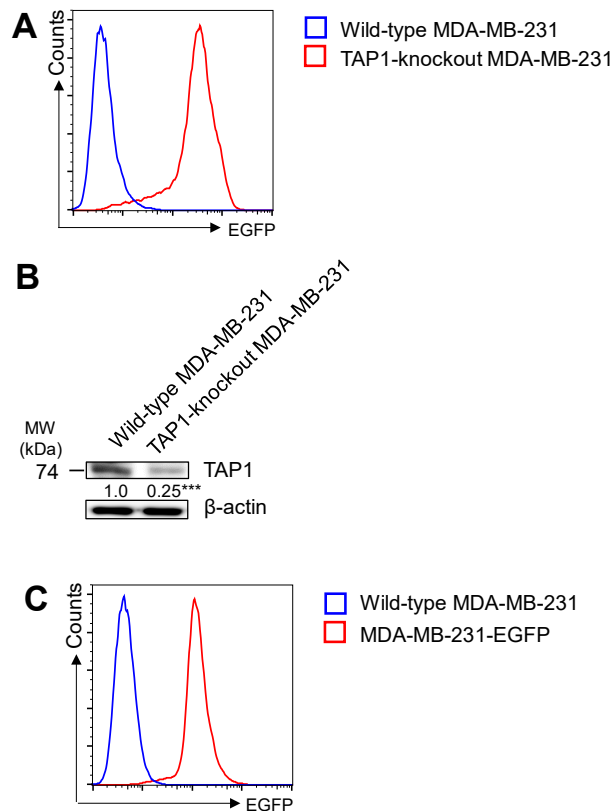

**Figure S6. Construction of TAP1 knockout MDA-MB-231 cells and MDA-MB-231-EGFP cells.**

(A) A flow cytometry histogram intended to assess sgRNA and Cas9 expression in an obtained stable TAP1 knockout MDA-MB-231 cell line (red line), in comparison with wild-type MDA-MB-231 cells (blue line), based on EGFP expression analysis. TAP1 knockout MDA-MB-231 cells were generated using modified all-in-one lentiviral vector eSpCas9-LentiCRISPIR v2-TAP1, containing a TAP1-targeting sgRNA sequence, eSpCas9 for enhanced target specificity, and *EGFP* as a selection marker.

(B) Representative western blots showing TAP1 deletion efficiency in TAP1-knockout MDA-MB-231 cells compared with wild-type MDA-MB-231 cells. TAP1 was detected by anti-TAP1 Ab (clone B-8). The number below the panel indicates the mean value ( $n = 2$ ) of band intensity relative to that of wild-type MDA-MB-231 cells after normalization of the band intensity to that of respective  $\beta$ -actin. \*\*\* $P < 0.001$  vs. wild-type MDA-MB-231 cells. A standard procedure for western blotting was performed. Equal amount of lysates was analyzed by western blotting, with  $\beta$ -actin serving as a loading control. Band intensities were quantified using the ImageJ software.

(C) A flow cytometric histogram for assessing EGFP expression in the newly established stable MDA-MB-231-EGFP cells (red line), compared to wild-type MDA-MB-231 cells (blue line).



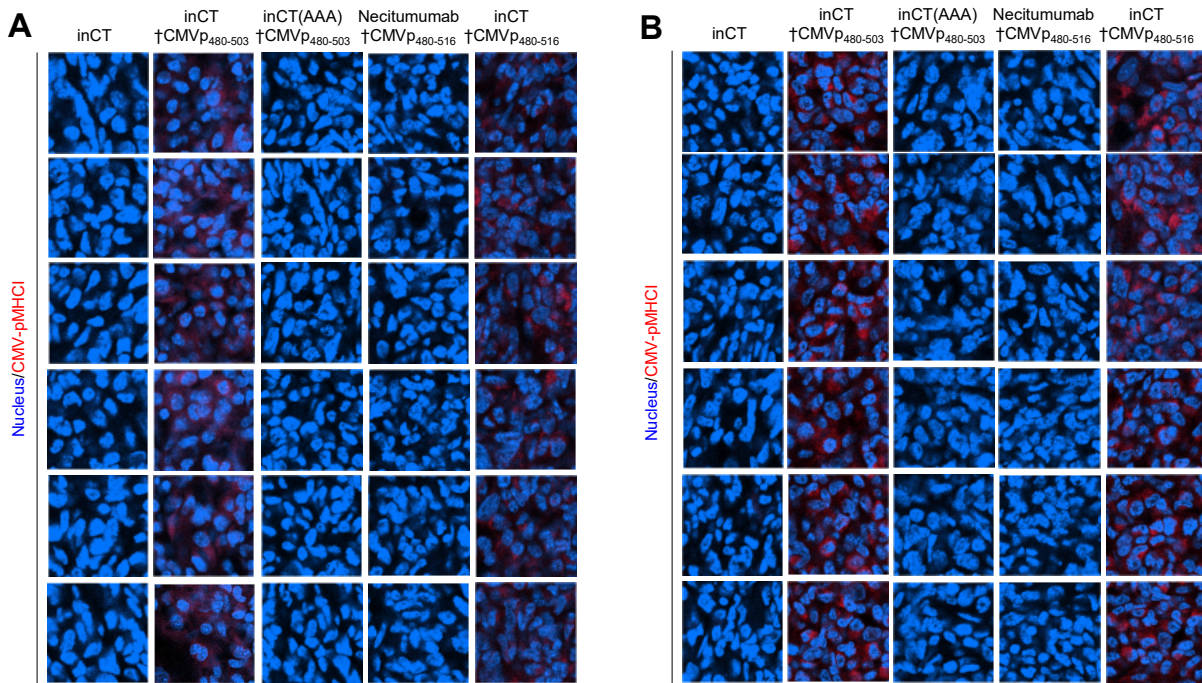

**Figure S7. Additional images of IHC detection of CMV-pMHCI (red) on MDA-MB-231 tumor tissues, the representative of which is shown in Fig. 3A (A) and Fig. 3E (B).**

**(A)** Images for the tumor tissues excised from NSG mice bearing a preestablished MDA-MB-231 cell-derived tumor xenograft (100–120 mm<sup>3</sup>), 24 h after a single i.p. injection of the indicated TEDbody or control Ab (20 mpk), as described in Fig. 3A.

**(B)** Images for the tumor tissues excised from mice on day 3 after the last treatment, as described in Fig. 3C. The quantification of the CMV-pMHCI-positive areas (red fluorescence intensity) is shown in Fig. 3E.

In (A) and (B), nuclei were stained with Hoechst 33342 (blue). Scale bar: 20 μm.

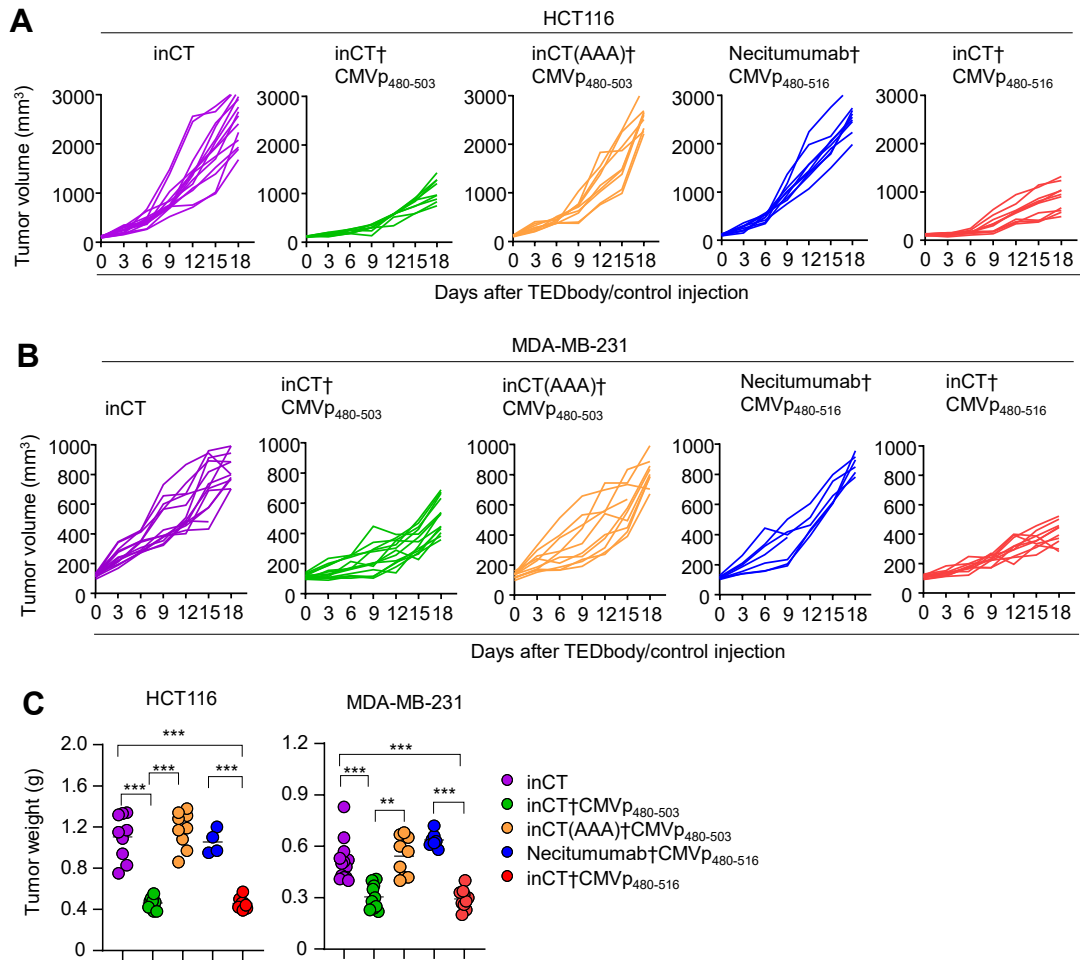

**Figure S8. The TEDbody suppresses *in vivo* growth of human tumor xenografts in immunodeficient NSG mice, as described in Fig. 3D.**

(A and B) Tumor growth profiles of individual mice bearing an HCT116 (A) or MDA-MB-231 tumor xenograft (B), treated as described in Fig. 3D. Each curve represents a tumor growth curve, constructed using tumor volume data from each mouse. The data from two independent experiments were pooled.

(C) In each treatment group, representative weight of individual tumors excised from mice on day 3 after the last treatment, as described in Fig. 3D. Each symbol represents a value obtained from an individual mouse. Midlines represent the mean values.  $**P < 0.01$  and  $***P < 0.001$ , a significant difference from the inCT group or between the indicated groups.

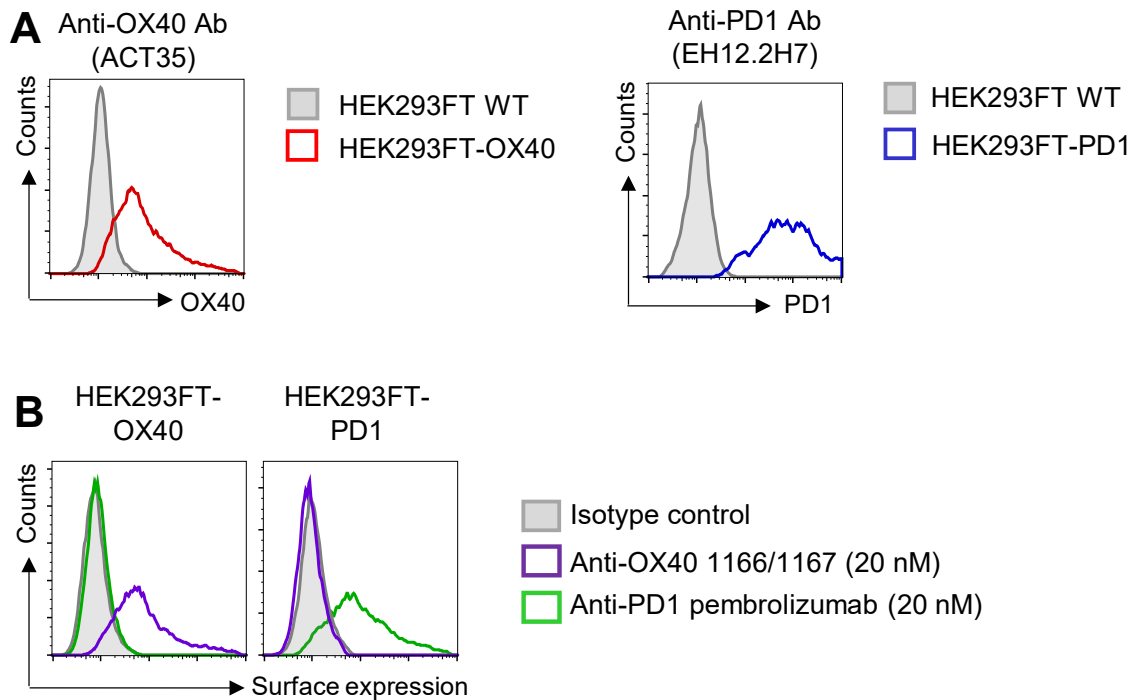

**Figure S9. Binding specificity of the anti-OX40 agonistic 1166/1167 Ab and anti-PD1 antagonistic Ab (pembrolizumab), constructed and used in this study, respectively, to the surface-expressed antigen.**

(A) Flow cytometric analysis of the surface expression of OX40 with a commercial anti-OX40 Ab (ACT365, Invitrogen) on HEK293FT wild type (H293T WT) cells and HEK293FT cells transiently expressing OX40 (HEK293FT-OX40), or the surface expression of PD1 using a commercial anti-PD1 Ab (EH12.2H7, Biogen) on HEK293FT WT cells and HEK293FT cells transiently expressing PD1 (HEK293FT-PD1).

(B) Flow cytometric analysis based on anti-OX40 1166/1167 Ab (left) and anti-PD1 Ab (pembrolizumab, right) binding to HEK293FT-OX40 and HEK293FT-PD1 cells, respectively.

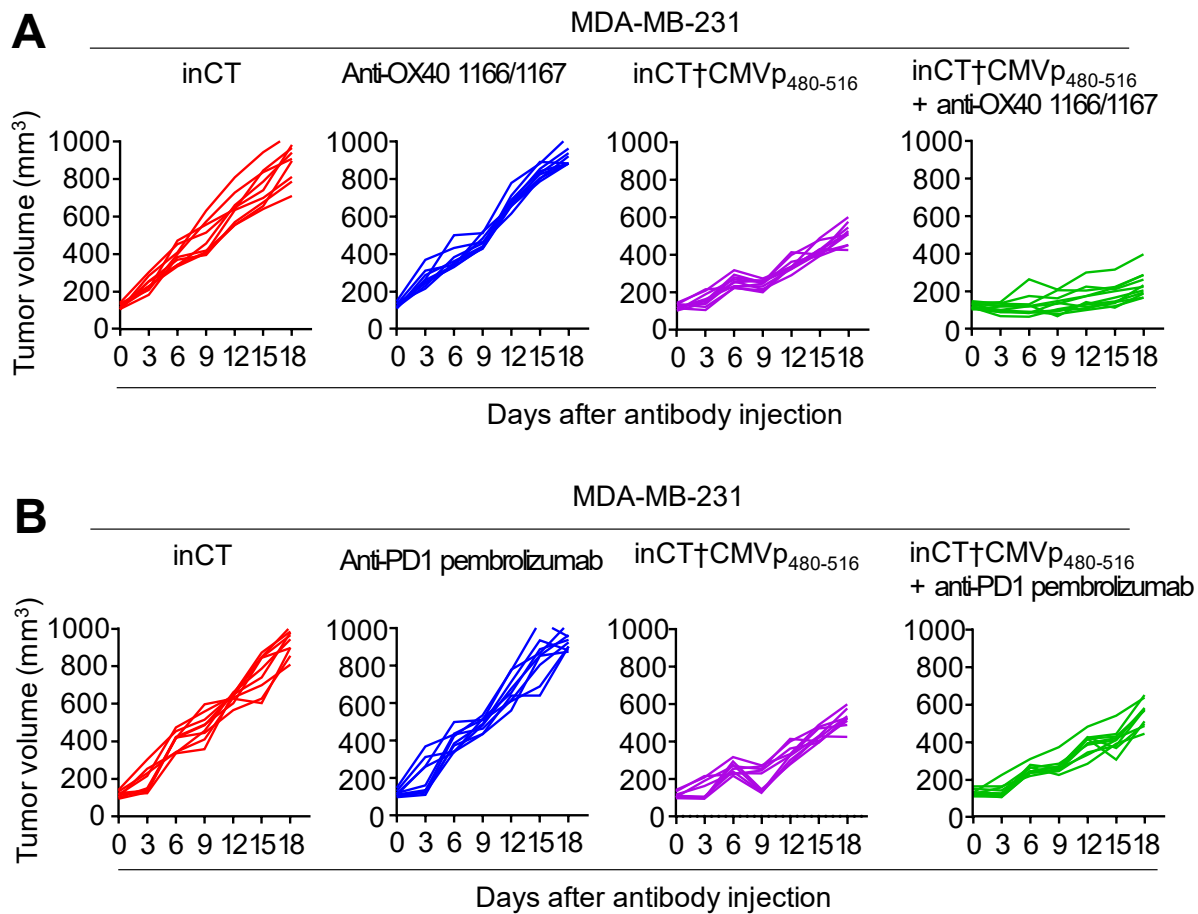

**Figure S10. *In vivo* antitumor efficacy of the inCT†CMVp<sub>480-516</sub> TEDbody, combined with either the anti-OX40 1166/1167 Ab or anti-PD1 pembrolizumab, in NSG mice harboring preestablished MDA-MB-231 orthotopic tumor xenografts, as described in Fig. 4A.**

(A and B) Tumor growth profiles of individual mice bearing an MDA-MB-231 tumor, treated with the combination described in Fig. 4A. Each curve represents a tumor growth curve, constructed based on tumor volume data from an individual mouse. The data from two independent experiments were pooled.

**Table S1.** List of synthesized peptides, used in this study.

| <b>Peptide</b>          | <b>Sequence</b>                                                         |
|-------------------------|-------------------------------------------------------------------------|
| CMVp <sub>495-503</sub> | <sup>495</sup> NLVPMVATV <sup>503</sup>                                 |
| CMVp <sub>480-503</sub> | <sup>480</sup> AVFTWPPWQAGILARNLVPMVATV <sup>503</sup>                  |
| CMVp <sub>480-504</sub> | <sup>480</sup> AVFTWPPWQAGILARNLVPMVATVQ <sup>504</sup>                 |
| CMVp <sub>480-506</sub> | <sup>480</sup> AVFTWPPWQAGILARNLVPMVATVQGG <sup>506</sup>               |
| CMVp <sub>480-510</sub> | <sup>480</sup> AVFTWPPWQAGILARNLVPMVATVQGGQNLKY <sup>510</sup>          |
| CMVp <sub>480-516</sub> | <sup>480</sup> AVFTWPPWQAGILARNLVPMVATVQGGQNLKYQEFFWD <sup>516</sup>    |
| CMVp <sub>480-519</sub> | <sup>480</sup> AVFTWPPWQAGILARNLVPMVATVQGGQNLKYQEFFWDAND <sup>519</sup> |
| HPV <sub>E11-19</sub>   | <sup>11</sup> YMLDLQPET <sup>19</sup>                                   |

**Table S2. List of resources (antibodies, recombinant proteins, and chemicals), used in this study.**

| Antibodies or Reagents                                               | Company                  | Catalog no.                           |
|----------------------------------------------------------------------|--------------------------|---------------------------------------|
| <b>Antibodies</b>                                                    |                          |                                       |
| Anti-Human IFN-gamma monoclonal Antibody (4S.B3)-FITC                | Invitrogen               | Cat. # 11-7319-82, RRID : AB_465415   |
| Anti-Human CD8a monoclonal Antibody (SK1)-PerCP eFlour710            | Invitrogen               | Cat. # 46-0087-42, RRID : AB_1834411  |
| Anti-Human CD8a monoclonal antibody (RPA-T8)-APC                     | Invitrogen               | Cat. # 17-0088-42, RRID : AB_10669564 |
| Anti-Human CD62L (L-Selectin) monoclonal Antibody (DREG56)-APC       | Invitrogen               | Cat. # 17-0629-41, RRID : AB_10671132 |
| Anti-Human CD45RA monoclonal antibody (HI100) -FITC                  | Invitrogen               | Cat. #11-0458-42, RRID : AB_940360    |
| Anti-Human CD107a (LAMP-1) monoclonal Antibody(eBioH4A3)-FITC        | Invitrogen               | Cat. # 11-1079-42, AB_10853196        |
| Anti-Human CCR7 monoclonal antibody (3D12) -PerCP-eFluor 710         | Invitrogen               | Cat# 46-1979-42, RRID : AB_10853814   |
| Anti-Human CD134(OX40) monoclonal antibody (ACT35)-FITC              | Invitrogen               | Cat. # 11-1347-42, RRID : AB_10597448 |
| Anti-Human CD69 monoclonal antibody (FN50)-FITC                      | Invitrogen               | Cat. # 11-0699-42, RRID : AB_10853975 |
| Goat polyclonal anti-mouse IgG antibody, Alexa Fluor 488-conjugated  | Invitrogen               | Cat. # A-11001, RRID: AB_2534069      |
| Mouse monoclonal anti-human integrin $\alpha\beta 3$ antibody (23C6) | R&D Systems              | Cat. # MAB3050, RRID: AB_2128187      |
| Mouse monoclonal anti-human integrin $\alpha\beta 5$ antibody (P5H9) | R&D Systems              | Cat. # MAB2528, RRID: AB_2280706      |
| Anti-Human CD279 (PD1) monoclonal Antibody (EH12.2H7)-APC            | Biologend                | Cat. # 329908, RRID : AB_940475       |
| Anti-Human CD274 (PD-L1) monoclonal Antibody (B7-H1)-APC             | Biologend                | Cat. # 329708, RRID : AB_940360       |
| Anti-Human CD223 (LAG-3) monoclonal Antibody (7H2C65)-FITC           | Biologend                | Cat. # 369210, RRID : AB_2716129      |
| Anti-Human TIGIT (VSTM3) monoclonal Antibody (A15153G)-APC           | Biologend                | Cat. # 372706, RRID : AB_2632732      |
| Anti-Human HLA-A2 monoclonal Antibody(BB7.2)-PE                      | Santa cruz Biotechnology | Cat# sc-32236-PE                      |
| Anti-human EEA1 monoclonal antibody (281.7)                          | Santa cruz Biotechnology | Cat. # sc-53939                       |
| Anti-human FTCD monoclonal antibody (58K-9)                          | Santa cruz Biotechnology | Cat. # sc-53128                       |
| Anti-TAP1 antibody (B-8)                                             | Santa cruz Biotechnology | Cat. # sc-376796                      |
| CMV pp65 <sub>495-509</sub> /HLA-A*02:01 pentamer-PE                 | Proimmune                | Cat. # F008-2A                        |
| Human IFN-gamma ELISA Kit                                            | Thermo Fisher Scientific | Cat. # 88-7316-88                     |
| <b>Chemicals and Recombinant Proteins</b>                            |                          |                                       |
| Streptavidin-conjugated R-phycoerythrin (SA-PE)                      | Thermo Fisher Scientific | Cat. # S21388                         |
| MG132                                                                | Thermo Fisher Scientific | Cat. # M7449                          |
| Dylight 550 Antibody labeling Kit                                    | Thermo Fisher Scientific | Cat. # 84530                          |
| ERAP1-IN-1                                                           | Chem Scene               | Cat. # CS-0112138                     |
| Recombinant Human IL-2                                               | Peptotech                | Cat. # 200-02                         |
| Lipofectamine 3000                                                   | Invitrogen               | Cat. # L3000008                       |
| Isoflurane                                                           | Piramal Critical Care    | Cat. # 66794-017-25                   |
| Brefeldin A                                                          | Thermo Fisher Scientific | Cat. # 00-4506-51                     |
| PKH26                                                                | Sigma                    | Cat. # MINI26-1KT                     |
| Poly-L-lysine solution                                               | Sigma                    | Cat. # P8920                          |
| Matrigel Basement Membrane Matrix                                    | Corning                  | Cat. # 354234                         |
| Fluorescence Mounting Medium                                         | Dako                     | Cat. # 3023                           |

**Table S3. Prevalence rates of CMVp-CTLs among PBMCs from HLA-A\*02-positive healthy donors.**

| Donor | HLA-A*02 expression | CMVp-CTL (%) |                                 | Donor | HLA-A*02 expression | CMVp-CTL (%) |                                 |
|-------|---------------------|--------------|---------------------------------|-------|---------------------|--------------|---------------------------------|
|       |                     | out of PBMCs | out of CD8 <sup>+</sup> T cells |       |                     | out of PBMCs | out of CD8 <sup>+</sup> T cells |
| HD#1  | -                   |              |                                 | HD#39 | -                   |              |                                 |
| HD#2  | -                   |              |                                 | HD#40 | -                   |              |                                 |
| HD#3  | +                   | -            | -                               | HD#41 | -                   |              |                                 |
| HD#4  | -                   |              |                                 | HD#42 | +                   | 0.18         | 0.58                            |
| HD#5  | -                   |              |                                 | HD#43 | -                   |              |                                 |
| HD#6  | +                   | 0.07         | 0.36                            | HD#44 | +                   | -            | -                               |
| HD#7  | +                   | 0.52         | 1.7                             | HD#45 | +                   | 0.71         | 2.4                             |
| HD#8  | +                   | -            | -                               | HD#46 | -                   |              |                                 |
| HD#9  | -                   |              |                                 | HD#47 | -                   |              |                                 |
| HD#10 | -                   |              |                                 | HD#48 | -                   |              |                                 |
| HD#11 | -                   |              |                                 | HD#49 | -                   |              |                                 |
| HD#12 | +                   | 0.04         | 0.14                            | HD#50 | +                   | -            | -                               |
| HD#13 | +                   | 0.57         | 3.03                            | HD#51 | +                   | 0.73         | 1.0                             |
| HD#14 | +                   | 0.13         | 0.6                             | HD#52 | -                   |              |                                 |
| HD#15 | -                   |              |                                 | HD#53 | +                   | 0.079        | 0.49                            |
| HD#16 | -                   |              |                                 | HD#54 | -                   |              |                                 |
| HD#17 | +                   | 0.11         | 0.66                            | HD#55 | -                   |              |                                 |
| HD#18 | +                   | 0.14         | 0.64                            | HD#56 | +                   | 0.07         | 0.19                            |
| HD#19 | +                   | 0.12         | 0.74                            | HD#57 | -                   |              |                                 |
| HD#20 | -                   |              |                                 | HD#58 | +                   | 1.01         | 3.64                            |
| HD#21 | +                   | 0.72         | 2.46                            | HD#59 | -                   |              |                                 |
| HD#22 | +                   | -            | -                               | HD#60 | +                   | -            | -                               |
| HD#23 | +                   | 0.72         | 5.34                            | HD#61 | +                   | 0.04         | 0.26                            |
| HD#24 | -                   |              |                                 | HD#62 | +                   | -            | -                               |
| HD#25 | +                   | -            | -                               | HD#63 | +                   | -            | -                               |
| HD#26 | +                   | 0.85         | 5.06                            | HD#64 | +                   | -            | -                               |
| HD#27 | +                   | 0.39         | 1.25                            | HD#65 | -                   |              |                                 |

|       |   |      |      |       |   |      |      |
|-------|---|------|------|-------|---|------|------|
| HD#28 | + | 0.08 | 0.37 | HD#66 | + | 0.36 | 1.61 |
| HD#29 | + | –    | –    | HD#67 | + | 0.07 | 0.40 |
| HD#30 | – |      |      | HD#68 | – |      |      |
| HD#31 | + | –    | –    | HD#69 | + | –    | –    |
| HD#32 | + | 0.3  | 0.94 | HD#70 | + | –    | –    |
| HD#33 | + | 0.13 | 0.57 | HD#71 | + | 0.15 | 1.17 |
| HD#34 | + | –    | –    | HD#72 | + | 0.8  | 3.6  |
| HD#35 | + | –    | –    | HD#73 | + | 0.29 | 1.85 |
| HD#36 | + | –    | –    | HD#74 | – | –    | –    |
| HD#37 | – | –    | –    | HD#75 | + | 0.21 | 1.45 |
| HD#38 | – |      |      |       |   |      |      |

In total, PBMCs from 75 healthy donors were analyzed. Forty-five out of 75 donors were positive for HLA-A\*02. The 45 samples of PBMCs from the HLA-A\*02-positive donors were analyzed via flow cytometry by double staining with the anti-CD8 Ab and PE-conjugated CMVp<sub>495-503</sub>-HLA-A\*02:01 pentamer, to determine the percentages of CMVp-CTLs among PBMCs and CD8<sup>+</sup> T cells, as shown in Fig. S4A. PBMCs were defined as CMVp-CTL-positive when the prevalence of CMVp-CTLs (i.e., double-positive cells stained with the anti-CD8 Ab and PE-conjugated CMVp<sub>495-503</sub>-HLA-A\*02:01 pentamer) was more than 0.1% of CD8<sup>+</sup> T cells among PBMCs ( $\geq 2.0 \times 10^5$  cells counted). Twenty-eight samples out of 45 samples of PBMCs from 45 HLA-A\*02-positive donors were CMVp-CTL-positive.



**Table S4. Characterization of CMVp-CTLs before and after *ex vivo* expansion with the CMVp<sub>495-503</sub> peptide**

|                                                      |                                                      |                    | Donors |       |       |       |       |       |       |       |       |       |       |       |
|------------------------------------------------------|------------------------------------------------------|--------------------|--------|-------|-------|-------|-------|-------|-------|-------|-------|-------|-------|-------|
|                                                      |                                                      |                    | HD#7   | HD#21 | HD#23 | HD#26 | HD#32 | HD#51 | HD#58 | HD#71 | HD#72 | HD#73 | HD#75 | HD#76 |
| Pre-expansion                                        | CMVp-CTLs (%)                                        | Total              | 0.31   | 0.72  | 0.52  | 0.61  | 0.42  | 0.81  | 0.79  | 0.15  | 0.8   | 0.29  | 0.21  | 0.15  |
|                                                      |                                                      | CD8 <sup>+</sup> T | 1.42   | 2.46  | 2.94  | 2.79  | 1.44  | 1     | 5.92  | 1.17  | 3.6   | 1.85  | 1.45  | 0.79  |
|                                                      | Memory phenotype (% of CMVp-CTLs)                    | T <sub>Naive</sub> | 9.15   | 4.9   | 6.3   | 7.28  | 0     | 5.33  | 10.4  | 1.89  | 2.9   | 0.98  | 0     | 0     |
|                                                      |                                                      | T <sub>CM</sub>    | 0.7    | 0.7   | 0     | 0.66  | 0     | 0     | 0.29  | 0.94  | 2.9   | 2.94  | 0     | 0     |
|                                                      |                                                      | T <sub>EM</sub>    | 2.82   | 2.1   | 11.0  | 9.93  | 54.0  | 1.18  | 0.86  | 24.5  | 4.35  | 8.82  | 23.9  | 2.05  |
|                                                      |                                                      | T <sub>EMRA</sub>  | 87.3   | 92.3  | 82.7  | 82.1  | 46.0  | 93.5  | 88.4  | 72.6  | 8.99  | 87.3  | 76.1  | 97.9  |
|                                                      | Immune checkpoint expression (% of CMVp-CTLs)        | PD1                | 41.5   | 17.6  | 39.2  | 34.1  | 39.5  | 24    | 59.3  | 13.1  | 18.2  | 61.4  | 61    | 35    |
|                                                      |                                                      | TIGIT              | 77.0   | 55.0  | 56.9  | 41.7  | 59.1  | 97.8  | 47.8  | 48.7  | 50.7  | 37.4  | 39.1  | 45.8  |
|                                                      |                                                      | LAG-3              | 33.3   | 38.7  | 20.8  | 19.5  | 15.6  | 18.7  | 20.9  | 25.3  | 29.5  | 28.4  | 49.9  | 34.7  |
|                                                      |                                                      | OX40               | 4.08   | 2.64  | 2.35  | 7.94  | 2.47  | 6     | 0.88  | 3.27  | 0.7   | 3.12  | 20    | 12.5  |
|                                                      | Pro-inflammatory chemokine receptor (% of CMVp-CTLs) | CXCR3              | 41.1   | 37.8  | 28.6  | 44.9  | 25.9  | 40.9  | 36.7  | 21.3  | 27.9  | 26.3  | 27.1  | 45.2  |
|                                                      | Post-expansion                                       | CMVp-CTLs (%)      | Total  | 35.6  | 11.9  | 72    | 1.06  | 2.35  | 82.7  | 58.2  | 16.5  | 40    | 16.2  | 8.78  |
| CD8 <sup>+</sup> T                                   |                                                      |                    | 67.3   | 20.7  | 95.3  | 4.47  | 6.06  | 97.5  | 93.5  | 47    | 72    | 40.3  | 40.7  | 87.8  |
| Memory phenotype (% of CMVp-CTLs)                    |                                                      | T <sub>Naive</sub> | 0      | 0     | 0     | 0     | 0     | 0     | 0.37  | 0     | 1.13  | 0     | 0     | 0     |
|                                                      |                                                      | T <sub>CM</sub>    | 0.21   | 0     | 0     | 0.35  | 0     | 0     | 0     | 0     | 0.53  | 0     | 0     | 0     |
|                                                      |                                                      | T <sub>EM</sub>    | 96.6   | 93.0  | 92.2  | 93.4  | 93.8  | 89.9  | 94.51 | 99.5  | 93.3  | 97.1  | 94.5  | 99.8  |
|                                                      |                                                      | T <sub>EMRA</sub>  | 3.21   | 7.0   | 7.21  | 6.22  | 6.2   | 10.1  | 5.13  | 0.5   | 5.01  | 2.9   | 5.5   | 0.22  |
| Immune checkpoint expression (% of CMVp-CTLs)        |                                                      | PD1                | 10.1   | 10.1  | 26.1  | 27.4  | 8.67  | 16    | 15.8  | 7.58  | 9.34  | 29.5  | 39.8  | 12.5  |
|                                                      |                                                      | TIGIT              | 37.1   | 32.5  | 33.4  | 27.7  | 32.9  | 33.5  | 33.0  | 30.7  | 37.8  | 24.2  | 20.1  | 31.7  |
|                                                      |                                                      | LAG-3              | 6.56   | 3.82  | 5.59  | 3.4   | 3.25  | 2.53  | 3.14  | 14.7  | 8.8   | 12.3  | 9.22  | 6.5   |
|                                                      |                                                      | OX40               | 18.9   | 12.4  | 30.3  | 30.4  | 13    | 11.9  | 7.26  | 18.3  | 21.2  | 28.9  | 25.6  | 43.8  |
| Pro-inflammatory chemokine receptor (% of CMVp-CTLs) |                                                      | CXCR3              | 98.6   | 98    | 97.7  | 94.9  | 66.4  | 88.4  | 63.3  | 72.3  | 78.2  | 65.9  | 99.5  | 70.7  |

CMVp-CTLs were analyzed by flow cytometry for the memory phenotypes, based on the surface expression of CCR7 and CD45RA in the four subsets (T<sub>Naive</sub>, T<sub>CM</sub>, T<sub>EM</sub>, and T<sub>EMRA</sub>), as presented in Fig. S5A, and for the surface expression of PD1, OX40, CXCR3, TIGIT, and LAG-3, detected with appropriate primary and secondary Abs, as presented in Fig. S5B.
